tive bacteria, can be grown more readily in the "shocked" animal than in the normal. However, the number of bacteria that can be recovered is too small to be of any significance in the endotoxemia of advanced hemorrhagic shock. (Frank, E. D., and others: *Effect of Hemorrhagic Shock on Viability of Inoculating Bacteria*, *Proc. Soc. Exp. Biol. Med.* 106: 394 (Feb.) 1961.)

**SHOCK** The coronary resistance and coronary sinus blood flow in dogs fall to about half their control levels during acute hemorrhagic shock in open-chested anesthetized dogs. The peripheral flow decreases as the resistance rises. Despite an inadequate pressor response, use of blood transfusion during shock is helpful in restoring both coronary and peripheral flows and resistance toward normal. Coronary flow increases and coronary vascular resistance decreases with the use of norepinephrine while peripheral effects are exaggerated. Norepinephrine protects the myocardium and thus may be a helpful but temporary measure in treating shock while other procedures are carried out to treat the cause. (Voices, K. D., and others: *Studies of Coronary and Peripheral Blood Flow Following Hemorrhagic Shock, Transfusion and L-Norepinephrine*, *Ann. Surg.* 153: 202 (Feb.) 1961.)

**HEART-LUNG MONITORING** The maintenance of a normal physiologic state during extracorporeal circulation is difficult. No specific routine meets the needs of all patients. Some patients die from inexplicable causes during or after open-heart operations. Difficulties may be related to alterations in blood gas or acid-base balance. To avoid damage to the blood by excessive trauma in the pump, and to keep the blood gases close to normal, continuous monitoring should be carried out. Pump speed, rotator disc speed, and gas flow are adjusted to meet patient requirements. Moment to moment information is provided by continuous monitoring of venous and arterial blood pressures, electroencephalogram, electrocardiogram, rectal, esophageal, and blood temperatures, venous and arterial oxygen tensions, and arterial blood pH. (Paton, B. C., Montgomery, V.,

and Swan, H.: *Methods for Control of Extracorporeal Circulation*, *A. M. A. Arch. Surg.* 82: 405 (Mar.) 1961.)

**MECHANOCARDIAC MASSAGE** Manual cardiac massage was compared with mechanical massage. Hand massage can maintain a satisfactory pressure response in both the pulmonary and systemic circulation. Mechanical compression of the heart using a pulsating balloon between the ventricles and the pericardium maintains adequate pressures. Heart trauma from prolonged mechanical massage is less than that from manual methods. Wide variations in flow and pressure response are frequently obtained with manual massage due to changes of position of the operator's hands while compressing the heart. Fatigue of the hand occurs in three to seven minutes depending on the rate of compression. A mechanocardiac pulsator is recommended in cases requiring prolonged cardiac massage. (Jones, G. A., and others: *Fundamental Studies on Maintenance of Circulation in Cardiac Asystole by Mechanocardiac Pulsator*, *Dis. Chest* 39: 207 (Feb.) 1961.)

**CARDIAC DEFIBRILLATION** If defibrillation is to be successful, fibrillation must cease completely in every fraction of the myocardium. If even a vestige of fibrillating muscle remains, coordinate contractions never develop. Successful defibrillation can be accomplished by means of relatively weak (100-170 volts), short-duration (0.15-0.30 second) alternating current shocks if the electrodes cover a large portion of the heart. During cardiac resuscitation procedures, there should be no hesitation to use epinephrine, in spite of warnings to the contrary. Sufficient cardiac tone helps prevent vigorous massage from damaging the myocardium. The use of rapidly-acting cardiac glycosides (ouabain, acetyl strophanthidin) is indicated, especially if prolonged massage and multiple episodes of defibrillation are necessary. A hypothermic state with a decreased threshold to ventricular fibrillation may develop in patients (especially infants) undergoing prolonged surgery and in patients requiring large quantities of blood. Maintenance of normal
